1 **METHICILLIN-RESISTANT STAPHYLOCOCCUS AUREUS CC22-MRSA-IV AS**  
2 **AN AGENT OF DAIRY COW INTRAMAMMARY INFECTIONS.**

3 **Giada Magro<sup>a</sup>, Marta Rebolini<sup>b</sup>, Daniele Beretta<sup>c</sup> and Renata Piccinini<sup>a#</sup>**

4 <sup>a</sup> Department of Veterinary Medicine, University of Milan, Via Celoria 10, 20133 Milan,  
5 Italy

6 <sup>b</sup> Department of Agricultural and Environmental Sciences - Production, Land, Agroenergy,  
7 University of Milan, Via Celoria 2, 20133 Milan, Italy

8 <sup>c</sup> Allegrini S.p.A., Zootechnics division, Vicolo Salvo D'Acquisto 2, 24050 Grassobbio, Italy

9

10 #corresponding author: [renata.piccinini@unimi.it](mailto:renata.piccinini@unimi.it)

11

12 **KEY WORDS:** dairy cow mastitis, *S. aureus*, CC22-MRSA-IV, zoonosis, humanosis

13

14 **ABSTRACT**

15 Methicillin-resistant *S. aureus* (MRSA) lineages have become major responsible of  
16 healthcare- and community-associated infections in human population. Bovine MRSA are  
17 sporadically detected in the dairy herd, but its presence might enhance the risk of zoonosis.  
18 Some lineages are able to lose the specific host tropism, being easily transmitted from  
19 animals to humans and vice-versa. The present study aims at clarifying the epidemiology of  
20 MRSA intramammary infections in a closed dairy herd, which was running a mastitis control  
21 program since years. Quarter milk samples were collected from all lactating cows once a  
22 week for 9 weeks and bacteriologically tested. At the end of the follow-up period, also a self-  
23 taken nasal swab of the milker was analysed. Three cows (12.5%) were MRSA positive, a  
24 four showed a transient infection and an MRSA was isolated also from the milker. Somatic  
25 cell counts of the infected quarters fluctuated from 1,000 to 1,800,000 cells/mL. All isolates

26 were genotyped using DNA microarrays and identified as the epidemic UK-EMRSA-15  
27 grouping in CC22. All strains carried the genes for  $\beta$ -lactam and macrolide resistance. The  
28 milker isolate differed from cow isolates mainly for the absence of the untruncated  $\beta$ -  
29 haemolysin and the presence of the immune evasion cluster. The milker had been  
30 volunteering in a nursing home since months, thus playing the role of MRSA vector into the  
31 herd. Our results showed the adaptive capacity of such MRSA to the bovine host. Therefore,  
32 we suggest that CC22-MRSA should be regarded as a potential cause of humanosis in dairy  
33 cattle herds.

#### 34 **IMPORTANCE**

35 Animals are the major source of new pathogens affecting human populations. However, the  
36 potential for pathogenic bacteria originally isolated in humans, to switch hosts and adapt to  
37 mammals is not to underestimate. Here, we report the emergence and spread of subclinical  
38 intramammary infections caused by a methicillin-resistant *Staphylococcus aureus* of human  
39 origin, in a closed dairy herd. The strain, responsible for epidemics in England and other  
40 Countries, was isolated also from the milker's nose, suggesting a host-adaptive evolution  
41 inside the herd. Our findings demonstrate that the human worker can act as a reservoir for  
42 contagious *Staphylococcus aureus* clones with potential for herd spread, highlighting the  
43 need of considering also the risk of humanosis in *Staphylococcus aureus* mastitis control  
44 programs.

#### 45 **INTRODUCTION**

46 *Staphylococcus aureus* (*S. aureus*) is widely known as the major cause of contagious bovine  
47 mastitis and an important pathogen in different livestock species<sup>1</sup>. The treatment with  $\beta$ -  
48 lactam antibiotics resulted in a selective pressure for resistance, and the acquisition of the  
49 mobile staphylococcal cassette chromosome (*SCCmec*), carrying the *mecA* or *mecC* gene,  
50 allows the bacteria to continue the cell wall biosynthesis, nullifying the antibiotic action.

51 Methicillin-resistant *S. aureus* (MRSA) lineages are the result of this successful evolution,  
52 becoming a major responsible of healthcare- and community-associated infections on a  
53 global scale<sup>2</sup>. In contrast with the human-associated lineages, bovine MRSA are sporadically  
54 detected in the dairy herds, being mostly associated with low prevalence of subclinical  
55 mastitis. Despite that, the persistence of MRSA clones in dairy herds might enhance the risk  
56 of zoonosis<sup>3</sup>. From the first bovine MRSA detected about 50 years ago<sup>4</sup>, understanding the  
57 risk of *S. aureus* cross-species transmission is still an interesting scientific field of research.  
58 The phylogenetic studies on MRSA demonstrated that bovine strains belong to a limited  
59 group of clonal complexes (CC)<sup>5,6</sup>. Human lineages of MRSA, such as CC5, CC8, CC22,  
60 CC30 and CC45 are rarely found in animals, suggesting host range barriers<sup>7,8</sup>. On the animal  
61 side, the most common livestock isolates belong to a small number of animal-associate  
62 clones: in particular bovine mastitis isolates group in few CCs, including CC1, CC8, CC97,  
63 CC126, CC130, CC133, CC398 and CC705<sup>1</sup>. Some of these have been demonstrating their  
64 ability to shift from animal to human hosts. This is the case of CC398 MRSA: firstly isolated  
65 in pig, poultry and ruminant farms, it is now displaying a zoonotic potential, contributing to  
66 the MRSA widespread diffusion in the human healthcare system<sup>9</sup>. By contrast, CC8  
67 originated in humans and emerged in the cow after ancient or recent host jumps<sup>10</sup>. The new  
68 bovine-adapted genotype loses the ability to colonize humans, lacking of a human-related  
69 mobile genetic element<sup>11</sup>. Therefore, if some *S. aureus* clones can lose the specific host  
70 tropism and be easily transmitted from animals to humans and vice-versa, we need to expand  
71 the concept of zoonosis including also humanosis. This study aims at clarifying the  
72 epidemiological origin of a new MRSA intramammary infection in a closed dairy cow herd,  
73 which was running a mastitis control program since years.

## 74 **RESULTS**

75 The results of bacteriological analysis of quarter milk samples collected at the first sampling  
76 showed that 3 out 24 lactating cows (12.5%) had 2 up to 3 quarters infected by *S. aureus*.  
77 PCR assay confirmed the identification of the isolates as *S. aureus*. During the follow-up  
78 period, SCC of the infected quarters fluctuated from extremely low values (1,000 cells/mL)  
79 to values exceeding one million cells/mL. At the third sampling, another animal tested  
80 positive in one quarter, but cured spontaneously within 3 weeks and remained negative in the  
81 following two months (the quarter was tested repeatedly until the end of August). The cow  
82 showed always very low SCC, never exceeding 7,000 cells/mL. Two infected animals were  
83 culled before the end of the study, i.e. after the 7<sup>th</sup> or 8<sup>th</sup> sampling respectively. Somatic cell  
84 count values and *S. aureus* shedding by the infected quarters of the 4 cows are presented in  
85 FIG 1.

86 *S. aureus* was recovered also from the milker's nasal swab.

87 The disk diffusion test showed the same pattern of antibiotic resistance for all *S. aureus*  
88 isolates: they were susceptible to macrolides and rifaximin, but resistant to penicillin,  
89 ampicillin, amoxicillin/clavulanate, oxacillin, 1<sup>st</sup>, 3<sup>rd</sup> and 4<sup>th</sup> generation cephalosporins,  
90 kanamycin and quinolones. Therefore, the isolates were classified as MRSA.

91 Microarray genotyping evidenced the *mecA* gene in all the 5 isolates, including the human  
92 one. They were identified as epidemic MRSA-15 (also known as UK-EMRSA-15 or Barnim  
93 EMRSA) and grouped in CC22. The microarray results showed minor differences among the  
94 isolates, as reported in TABLE 1. All cow isolates carried the  $\gamma$ -haemolysin genes *hlgA* and  
95 *hlgB*, only the strain isolated from the last infected cow carried *hlgC*. All isolates were  
96 Panton-Valentine leucocidin (PVL) negative, but positive for the enterotoxin genes *seg*, *sei*,  
97 *sem*, *sen*, *seo* and *seu* an allelic variant of von Willebrand factor (vwb-RF122). They  
98 harboured also the protease genes encoding aureolysin or staphopain A, B (data not shown).  
99 Human and cow isolates differed basically for the absence of the untruncated  $\beta$ -haemolysin

100 and the presence of *sak*, *chp* and *scn* uniquely in the milker *S. aureus*. The demonstration of  
101 the genes for  $\beta$ -lactams resistance in all isolates explained the phenotypic resistance  
102 observed. Conversely, *ermC*, one of the genes encoding macrolide resistance, did not express  
103 resistance to tylosin or sipiramycin in the susceptibility test.

## 104 **DISCUSSION**

105 Methicillin-resistant *S. aureus* (MRSA) strains are the major cause of healthcare- and  
106 community-associated infections on a global scale<sup>2</sup>. Different lineages, termed as livestock-  
107 associated MRSA (LA-MRSA) are implicated in farm animal infections. The possible  
108 transmission of human lineages to companion animals, through their owners or caretakers is  
109 widely demonstrated<sup>12,13,14</sup>, therefore the infection is regarded as a humanosis. In dairy cattle,  
110 MRSA is usually considered as a marginal problem in terms of herd contagiousness but at the  
111 same time, a possible reservoir of new human infection<sup>3</sup>. Conversely, the concept of  
112 humanosis is still poorly considered. The reason behind this underestimation is probably due  
113 to the difficult demonstration of the epidemiological chain leading to the infection in the  
114 intensive dairy herd, what makes the distinction between zoonosis and humanosis a  
115 complicated problem. In the last decades, several studies focused on the possible transmission  
116 of LA-MRSA to human population, demonstrating the zoonotic role of some lineages in pig,  
117 cattle, and poultry farm workers<sup>15,16</sup>. CC398 is the most important group and the possible  
118 colonization of cattle farm personnel has been considered as a potential MRSA vector into  
119 different compartment of the farm<sup>17</sup> or into hospital<sup>18</sup>. The results of the present study led us  
120 to consider the subclinical intramammary infections of the dairy cows not as a zoonosis, but a  
121 humanosis, since all *S. aureus* isolates from quarter milk and the isolate from the milker's  
122 nose belonged to the same clonal lineage, i.e. the epidemic UK-EMRSA-15. It should be  
123 highlighted that the milker volunteered since months in a nursing home. Such lineage is  
124 largely diffused in pets: dogs and cats acquire the infection by their owners or veterinarian<sup>19</sup>.

125 The genome comparison of CC22-MRSA isolated from humans and pets demonstrated a few  
126 differences, mostly in the carriage of mobile genetic elements (MGEs) rather than in core  
127 genes<sup>14</sup>. Indeed, the lineage is characterized by a flexible MGEs profile, associated with a  
128 quick ability of MGEs loss and acquisition, which might explain its success in dissemination  
129 and persistence in different hosts<sup>20</sup>. In our study, the microarrays results showed some  
130 differences in the occurrence of the immune evasion cluster (IEC): the  $\beta$ -haemolysin  
131 converting prophage carrying human-specific host immune evasion genes (*sak-scn-chp*) was  
132 present only in the human isolate, suggesting a quick adaptation of the lineage to the bovine  
133 host. This finding is similar to the case of CC8 human-to-animal jump<sup>10,11</sup>. Analogously to  
134 CC8, the loss of the prophage might help the establishment of infection in the dairy cow. A  
135 further result strengthening our hypothesis is the presence of the untruncated  $\beta$ -haemolysin  
136 uniquely in the bovine MRSA isolates, probably because the gene is necessary in ungulates  
137 for the different structure of erythrocyte membranes. The outbreak and dissemination of  
138 CC22-MRSA infection in the herd before our monitoring support the hypothesis that the  
139 adaptation of the lineage to this new host should not be underestimated. The cow D isolate  
140 differed from the other bovine isolates for the carriage of the *hlgC/lukS* gene, which in turn  
141 gave an ambiguous result in the human isolate. We would like to highlight this result,  
142 because the cow was the only one affected by a transient intramammary infection. We could  
143 speculate that the pathogenicity island carrying  $\gamma$ -haemolysin might have been lost in the  
144 adaptation to the bovine host. All the isolates harboured the allelic variant of the Von  
145 Willebrand binding protein gene (*vvb -RF122*), which is considered one of the mechanisms  
146 associated to *S. aureus* pathogenicity in the cow and a specific marker of host adaptation<sup>21</sup>. At  
147 the light of these results, we strongly suggest that CC22-MRSA be regarded as a potential  
148 cause of humanosis in dairy cattle herds.

## 149 **Conclusions**

150 The present study provides evidence for the importance and impact of the UK-EMRSA-15 as  
151 a cause of mastitis in the dairy cow, demonstrating the adaptive capacity of the lineage to the  
152 bovine host.. The transmission of MRSA between different hosts revoke the concept of “One  
153 Health”: the true scale of the problem is still unknown, and further studies addressing both  
154 animals and farm personnel are required, in order to monitor the possible emergence of new  
155 lineages among the dairy cattle. In order to minimize the risk of *S. aureus* spread within-herd  
156 and in the community, the herd biosecurity measurements should be implemented.

## 157 **MATERIAL AND METHODS**

### 158 **Herd history**

159 The study was performed in a small farm located in Lombardy region. The herd is housed in  
160 freestall with cubicle barns and milking parlour. A contagious mastitis control program has  
161 been running since years, because raw milk is sold directly at the farm. One year and half  
162 before our study, the routine bacteriological analysis of bulk tank milk had evidenced the  
163 presence of *S. aureus*, with a value of 40 CFU/mL. Quarter milk samples were collected from  
164 all the cows and the new infected ones were milked after the healthy animals, but not  
165 physically segregated. After 6 months, *S. aureus* count had increased to 140 CFU/mL.  
166 Therefore, the owner decided to cull part of the infected animals, so that 6 months before the  
167 beginning of the present study the bulk milk concentration of *S. aureus* had decreased to 73  
168 CFU/mL. New cows were not introduced into the herd, therefore the total number of lactating  
169 animals was 24.

### 170 **Sampling and bacteriological analysis**

171 Quarter milk samples of all the lactating animals were aseptically collected once a week for 9  
172 weeks (T1 to T9) during milking in the months of April to June, and immediately delivered to  
173 the laboratory. Bacteriological analysis was performed as previously indicated<sup>22</sup> and somatic  
174 cells (SCC) were counted using a Bentley Somacount 150 (Bentley, USA).

175 At the end of the follow-up period, we also analysed a self-taken nasal swab of the milker.  
176 The isolates were presumptively identified as *S. aureus* according to the following scheme:  
177 Gram-positive cocci, haemolytic on blood agar, catalase positive, and coagulase positive in  
178 4–24 h.  
179 The antibiotic resistance to the drugs mostly used in mastitis therapy (penicillin, ampicillin,  
180 amoxicillin/clavulanate, oxacillin, 1<sup>st</sup>, 3<sup>rd</sup> and 4<sup>th</sup> generation cephalosporins, tylosin,  
181 kanamycin, rifaximin, quinolones, thiamphenicol, trimethoprim/sulfamethoxazole) was tested  
182 by disk-diffusion.

### 183 **Molecular analysis**

184 The DNA of coagulase-positive strains was extracted using DNeasy kit (QIAGEN, Hilden,  
185 Germany), with the addition of lysostaphin (5 mg/mL; Sigma-Aldrich, St. Luis, MO, USA)  
186 for bacterial lysis. Amount and quality of DNA samples were measured on a NanoDrop ND-  
187 1000 spectrophotometer (Nano-Drop Technologies, Wilmington, DE, USA). They were  
188 confirmed as *S. aureus* by a duplex real-time PCR assay<sup>23</sup>.

189 Genotyping was performed by DNA microarrays using Alere StaphyType DNA microarray  
190 (Alere Technologies GmbH, Jena, Germany). The microarray covers approximately 170  
191 distinct genes and their allelic variants for a total of 330 target sequences including accessory  
192 gene regulator alleles, genes coding for virulence factors and for microbial surface  
193 components recognizing adhesive matrix molecules (MSCRAMMs), capsule type-specific  
194 genes, and numerous antimicrobial resistance genes<sup>24</sup>. Probes for the methicillin-resistance  
195 genes *mecA* and *mecC* are also included. The overall pattern was analyzed automatically for  
196 the presence or absence of specific genes and compared to a database of strain profiles  
197 allowing the assignment to Clonal Complexes (CC). The genotyping service was performed  
198 at Alere Technologies (Jena, Germany).

### 199 **ACKNOWLEDGMENTS**



200 We thank L. Zanini, milk specialist of the Breeder Association of Lombardy, for supplying  
201 the bacteriological results of previous analysis of bulk milk.

## 202 REFERENCES

- 203 1. Fitzgerald JR. 2012. Livestock-associated *Staphylococcus aureus*: Origin, evolution and  
204 public health threat. Trends Microbiol 20(4):192-198.
- 205 2. Köck R, Becker K, Cookson B, van Gemert-Pijnen JE, Harbarth S, Kluytmans J, Mielke  
206 M, Peters G, Skov RL, Struelens MJ, Tacconelli E, Navarro Torné A, Witte W, Friedrich  
207 AW. 2010. Methicillin-resistant *Staphylococcus aureus* (MRSA): burden of disease and  
208 control challenges in Europe. Euro Surveill 15(41):1-9.
- 209 3. Luini M, Cremonesi P, Magro G, Bianchini V, Minozzi G, Castiglioni B, Piccinini R.  
210 2015. Methicillin-resistant *Staphylococcus aureus* (MRSA) is associated with low within-  
211 herd prevalence of intra-mammary infections in dairy cows: Genotyping of isolates. Vet  
212 Microbiol 178(3):270-274.
- 213 4. Devriese LA, Damme LR, Fameree L. 1972. Methicillin (Cloxacillin)-Resistant  
214 *Staphylococcus aureus* strains isolated from bovine mastitis cases. Zentralbl  
215 Veterinarmed B 19(7):598–605.
- 216 5. Enright MC, Day NP, Davies CE, Peacock SJ, Spratt BG. 2000. Multilocus sequence  
217 typing for characterization of methicillin-resistant and methicillin-susceptible clones of  
218 *Staphylococcus aureus*. J Clin Microbiol 38:1008–15.
- 219 6. Holden MT, Hsu LY, Kurt K, Weinert LA, Mather AE, Harris SR, Strommenger B,  
220 Layer F, Witte W, de Lencastre H, Skov R, Westh H, Zemlicková H, Coombs G, Kearns  
221 AM, Hill RL, Edgeworth J, Gould I, Gant V, Cooke J, Edwards GF, McAdam PR,  
222 Templeton KE, McCann A, Zhou Z, Castillo-Ramírez S, Feil EJ, Hudson LO, Enright  
223 MC, Balloux F, Aanensen DM, Spratt BG, Fitzgerald JR, Parkhill J, Achtman M, Bentley

- 224 SD, Nübel U. 2013. A genomic portrait of the emergence, evolution, and global spread of  
225 a methicillin-resistant *Staphylococcus aureus* pandemic. *Genome Res* 23(4):653–64.
- 226 7. Enright MC, Robinson DA, Randle G, Feil EJ, Grundmann H, Spratt BG. 2002. The  
227 evolutionary history of methicillin resistant *Staphylococcus aureus* (MRSA). *Proc Natl*  
228 *Acad Sci USA* 99(11):7687-7692.
- 229 8. Sung JM, Lloyd DH, Lindsay JA. 2008. *Staphylococcus aureus* host specificity:  
230 comparative genomics of human versus animal isolates by multi-strain microarray.  
231 *Microbiol* 154:1949-59.
- 232 9. Ballhausen B, Jung P, Kriegeskorte A, Makgotlho Phuti E, Ruffing Ulla von Müller L,  
233 Köck R, Peters G, Herrmann M, Ziebuhr W, Becker K, Bischoff M. 2014. LA-MRSA  
234 CC398 differ from classical community acquired-MRSA and hospital acquired-MRSA  
235 lineages: Functional analysis of infection and colonization processes. *Int J Med Microbiol*  
236 304(7):777–786.
- 237 10. Sakwinska O , Giddey M , Moreillon M , Morisset D , Waldvogel A , Moreillon P.  
238 2011. *Staphylococcus aureus* host range and human-bovine host shift. *Appl Environ*  
239 *Microbiol* 77(17):5908–5915.
- 240 11. Resch G, François P, Morisset D, Stojanov M, Bonetti EJ, Schrenzel J, Sakwińska O,  
241 Moreillon, P. 2013. Human-to-bovine jump of *Staphylococcus aureus* CC8 is associated  
242 with the loss of a  $\beta$ -haemolysin converting prophage and the acquisition of a new  
243 staphylococcal cassette chromosome. *PloS one* 8(3): e58187.
- 244 12. Weese JS. 2010. Methicillin-resistant *Staphylococcus aureus* in animals. *ILAR J* 51: 233–  
245 244.
- 246 13. Weese JS, van Duijkeren E. 2010. Methicillin-resistant *Staphylococcus aureus* and  
247 *Staphylococcus pseudintermedius* in veterinary medicine. *Vet Microbiol* 140: 418–429.

- 248 14. Loeffler A, McCarthy A, Lloyd DH, Musilová E, Pfeiffer DU, Lindsay JA. 2013.  
249 Whole-genome comparison of methicillin-resistant *Staphylococcus aureus* CC22  
250 SCCmecIV from people and their in-contact pets. *Vet Dermatol* 24:538–e128.
- 251 15. Morgan M. Methicillin-resistant *Staphylococcus aureus* and animals: Zoonosis or  
252 humanosis? *Antimicrob Agents Chemother* 62:1181–1187.
- 253 16. Springer B, Orendi U, Much P, Höger G, Ruppitsch W, Krziwanek K, Metz-Gercek S,  
254 Mittermayer H. Methicillin-resistant *Staphylococcus aureus*: a new zoonotic agent? *Wien*  
255 *Klin Wochenschr* 121(3-4):86-90.
- 256 17. Feßler AT, Olde Riekerink RGM, Rothkamp A, Kadlec K, Sampimon OC, Lam TJGM,  
257 Schwarz S. 2012. Characterization of methicillin-resistant *Staphylococcus aureus* CC398  
258 obtained from humans and animals on dairy farms. *Vet Microbiol* 160(1):77–84.
- 259 18. Graveland H, Duim B, van Duijkeren E, Heederik D, Wagenaar JA. 2011. Livestock-  
260 associated methicillin-resistant *Staphylococcus aureus* in animals and humans. *Int J Med*  
261 *Microbiol* 301(8):630–634.
- 262 19. Wipf JR, Perreten V. 2016. Methicillin-resistant *Staphylococcus aureus* isolated from  
263 dogs and cats in Switzerland. *Schweiz Arch Tierheilkd* 158(6):443–450.
- 264 20. Jamrozny D, Coll F, Mather AE, Harris SR, Harrison EM, MacGowan A, Karas A, Elston  
265 T, Estée TM, Parkhill J. 2017. Evolution of mobile genetic element composition in an  
266 epidemic methicillin-resistant *Staphylococcus aureus*: Temporal changes correlated with  
267 frequent loss and gain events. *BMC Genomics* 18(1):1–12.
- 268 21. Viana D, Blanco J, Tormo-Más MA, Selva L, Guinane CM, Baselga R, Corpa J, Lasa I,  
269 Novick RP, Fitzgerald JR, Penadés JR. 2010. Adaptation of *Staphylococcus aureus* to  
270 ruminant and equine hosts involves SaPI-carried variants of von Willebrand factor-  
271 binding protein. *Mol Microbiol* 77:1583–1594.

- 272 22. Hogan JS, Gonzales RN, Harmon RJ, Nickerson SC, Oliver SP, Pankey JW, Smith KL.  
273 1999. Laboratory Handbook on Bovine Mastitis (Revised ed.), National Mastitis Council  
274 Inc. Madison WI p.222.
- 275 23. Pilla R, Snel GGM, Malvisi M, Piccinini R. 2013. Duplex real-time PCR assay for rapid  
276 identification of *Staphylococcus aureus* isolates from dairy cow milk. J Dairy Res  
277 80(2):223–6.
- 278 24. Monecke S, Kuhnert P, Hotzel H, Slickers P, Ehricht, R. 2007. Microarray based study  
279 on virulence-associated genes and resistance determinants of *Staphylococcus aureus*  
280 isolates from cattle. Vet Microbiol 125(1–2):128–140.

281 **TABLE 1.** Main results of microarray analysis showing the differences among the MRSA  
282 strains isolated during the study.

| Virulence factor                                 | Cow A | Cow B | Cow C | Cow D | Milker's nose |
|--------------------------------------------------|-------|-------|-------|-------|---------------|
| $\beta$ -haemolysin probe 1, 2, 3 ( <i>hly</i> ) | POS   | POS   | POS   | POS   | POS           |
| Un-truncated $\beta$ -haemolysin                 | POS   | POS   | POS   | POS   | NEG           |
| Staphylokinase, <i>sak</i>                       | NEG   | NEG   | NEG   | NEG   | POS           |
| Chemotaxis-inhibiting protein, <i>chp</i>        | NEG   | NEG   | NEG   | NEG   | POS           |
| Staph. complement inhibitor, <i>scn</i>          | NEG   | NEG   | NEG   | NEG   | POS           |
| $\gamma$ - haemolysin, component A, <i>hlyA</i>  | POS   | POS   | POS   | POS   | POS           |
| $\gamma$ - haemolysin, component B, <i>hlyB</i>  | POS   | POS   | POS   | POS   | POS           |

|                                                                     |     |     |     |     |     |
|---------------------------------------------------------------------|-----|-----|-----|-----|-----|
| $\gamma$ - haemolysin, component C, <i>lukS</i>                     | NEG | NEG | NEG | POS | AMB |
| Panton-Valentine leucocidin, component F, <i>lukF-PV</i>            | NEG | NEG | NEG | NEG | NEG |
| Panton-Valentine leucocidin, component S, <i>lukS-PV</i>            | NEG | NEG | NEG | NEG | NEG |
| Ruminant hypothetical leukocidin, component F, <i>lukF-PV (P83)</i> | NEG | NEG | NEG | NEG | NEG |
| Ruminant hypothetical leukocidin, component S, <i>lukM</i>          | NEG | NEG | NEG | NEG | NEG |
| Leukocidin D, <i>lukD</i>                                           | NEG | NEG | NEG | NEG | NEG |
| Leukocidin E, <i>lukE</i>                                           | NEG | NEG | NEG | NEG | POS |
| Leukocidin/haemolysin toxin, <i>lukX</i>                            | POS | POS | POS | POS | POS |
| Leukocidin/haemolysin toxin, <i>lukY</i>                            | POS | POS | POS | POS | NEG |

---

283

284 **FIG 1.** Quarter milk Somatic Cell Counts and MRSA shedding by infected cows during the  
285 study. The capital letters A-D indicate the four cows. The symbol \* represents the recovery of  
286 *S. aureus* in the milk.

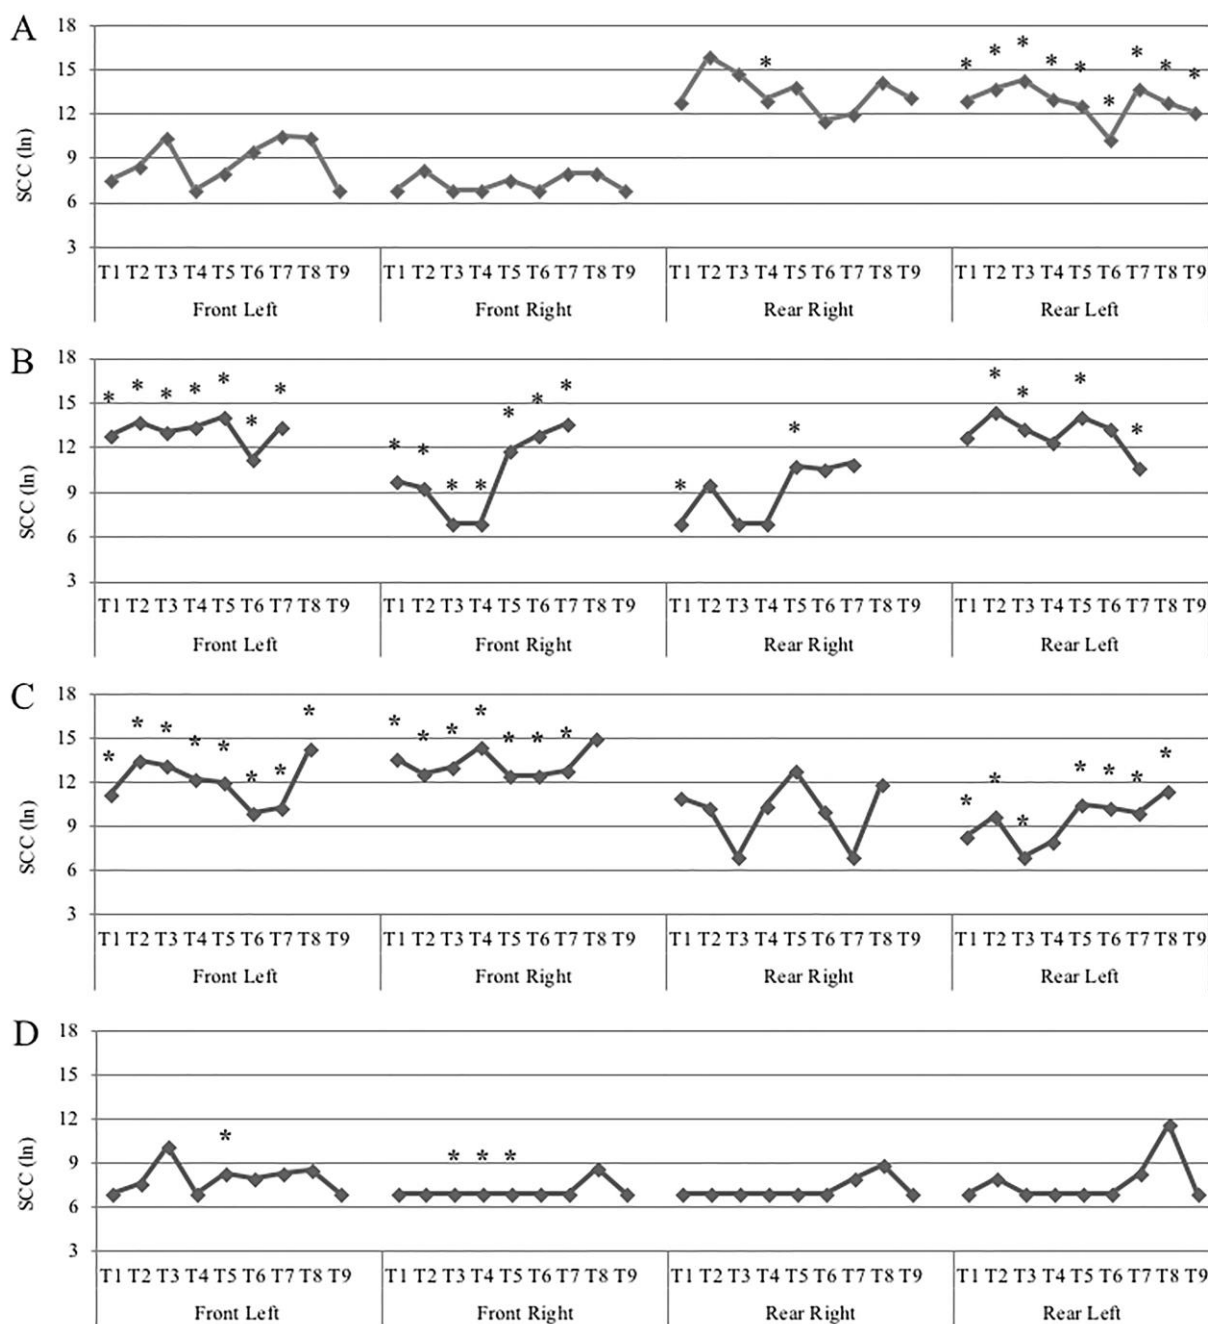

Source: http://biorxiv.org/content/10.1101/326553v1.full.pdf
